# Supplementary material for: The Hatching Time of Broiler Chickens Modifies Not Only the Production Traits but Also the Early Bacteriota Development of the Ceca
Source: MDPI journal article supplement (doi:10.3390/ani13172712), 2023-08-25
Supplement: s1 [file s1]

**Supplementary Material**

**The hatching time of broiler chickens modifies not only the production traits, but also the bacteriota development in the ceca**

**Nikoletta Such <sup>1</sup>, Kornél Schermann <sup>1</sup>, László Pál <sup>1</sup>, László Menyhárt <sup>2</sup>, Valéria Farkas <sup>1</sup>, Gábor Csitári <sup>1</sup>, Brigitta Kiss <sup>1</sup>, Kesete Goitom Tewelde <sup>1</sup> and Károly Dublec <sup>1</sup>**

<sup>1</sup> Institute of Physiology and Nutrition, Hungarian University of Agriculture and Life Sciences, Georgikon Campus, 8360 Keszthely, Hungary; Deák Ferenc Street 16.; such.nikoletta.amanda@uni-mate.hu; schermannkornel2000@gmail.com; pal.laszlo@uni-mate.hu; farkas.valeria@uni-mate.hu; csitari.gabor@uni-mate.hu; kiss.brigitta.gyongyi@phd.uni-mate.hu; kesete.goitom.tewelde@phd.uni-mate.hu; dublec.karoly@uni-mate.hu

<sup>2</sup> Institute of Technology, Hungarian University of Agriculture and Life Sciences, Georgikon Campus, Deák Ferenc Street 16, 8360 Keszthely, Hungary; menyhart.laszlo@uni-mate.hu

\* Correspondence: dublec.karoly@uni-mate.hu

† These authors contributed equally to this work.

**Table S1.** The effect of hatching time and parent age on the caecal microbiota composition at the family level at 11 day of age.

| Family (%)                           | Parent flock age |              |            |                         | FDR p-values  |                  |             |
|--------------------------------------|------------------|--------------|------------|-------------------------|---------------|------------------|-------------|
|                                      | Hatching time    | Young parent | Old parent | Average (Hatching time) | Hatching time | Parent flock age | Interaction |
| <i>Ruminococcaceae</i>               | Early            | 35.051       | 33.467     | 34.259                  | 0.443         | 0.750            | 0.635       |
|                                      | Late             | 29.792       | 24.768     | 27.280                  |               |                  |             |
|                                      | Average (Age)    | 32.422       | 29.118     |                         |               |                  |             |
| <i>Lachnospiraceae</i>               | Early            | 22.571       | 30.636     | 26.604                  | 0.886         | 0.683            | 0.846       |
|                                      | Late             | 27.650       | 23.050     | 25.350                  |               |                  |             |
|                                      | Average (Age)    | 25.111       | 26.843     |                         |               |                  |             |
| <i>Lactobacillaceae</i>              | Early            | 14.110       | 12.439     | 13.275                  | 0.504         | 0.717            | 0.729       |
|                                      | Late             | 10.458       | 7.046      | 8.752                   |               |                  |             |
|                                      | Average (Age)    | 12.284       | 9.743      |                         |               |                  |             |
| <i>Bacteroidaceae</i>                | Early            | 9.662        | 5.952      | 7.807                   | 0.517         | 0.742            | 0.933       |
|                                      | Late             | 12.424       | 27.494     | 19.959                  |               |                  |             |
|                                      | Average (Age)    | 11.043       | 16.723     |                         |               |                  |             |
| <i>Erysipelotrichaceae</i>           | Early            | 4.533        | 5.118      | 4.826                   | 0.542         | 0.702            | 0.425       |
|                                      | Late             | 2.845        | 3.680      | 3.262                   |               |                  |             |
|                                      | Average (Age)    | 3.689        | 4.399      |                         |               |                  |             |
| <i>Peptostreptococcaceae</i>         | Early            | 0.318        | 1.073      | 0.695                   | 0.533         | 0.816            | 0.921       |
|                                      | Late             | 0.232        | 0.372      | 0.302                   |               |                  |             |
|                                      | Average (Age)    | 0.275        | 0.722      |                         |               |                  |             |
| <i>Clostridiales_vadinBB60_group</i> | Early            | 3.098        | 5.917      | 4.508                   | 0.294         | 0.849            | 0.634       |
|                                      | Late             | 7.171        | 7.921      | 7.546                   |               |                  |             |
|                                      | Average (Age)    | 5.135        | 6.919      |                         |               |                  |             |
| <i>Enterococcaceae</i>               | Early            | 0.435        | 1.172      | 0.804                   | 0.849         | 0.695            | 0.707       |
|                                      | Late             | 0.895        | 0.518      | 0.706                   |               |                  |             |
|                                      | Average (Age)    | 0.665        | 0.845      |                         |               |                  |             |
| <i>Enterobacteriaceae</i>            | Early            | 0.153        | 0.420      | 0.287                   | 0.365         | 0.965            | 1.447       |
|                                      | Late             | 1.929        | 0.398      | 1.163                   |               |                  |             |
|                                      | Average (Age)    | 1.041        | 0.409      |                         |               |                  |             |
| <i>Christensenellaceae</i>           | Early            | 0.192        | 0.124      | 0.158                   | 0.589         | 0.700            | 0.553       |
|                                      | Late             | 0.103        | 0.052      | 0.077                   |               |                  |             |
|                                      | Average (Age)    | 0.148        | 0.088      |                         |               |                  |             |
| <i>Defluviitaleaceae</i>             | Early            | 0.108        | 0.124      | 0.116                   | 0.959         | 0.699            | 0.914       |
|                                      | Late             | 0.099        | 0.129      | 0.114                   |               |                  |             |
|                                      | Average (Age)    | 0.103        | 0.127      |                         |               |                  |             |
| <i>Eggerthellaceae</i>               | Early            | 0.071        | 0.088      | 0.079                   | 0.374         | 0.910            | 0.950       |
|                                      | Late             | 0.040        | 0.063      | 0.051                   |               |                  |             |
|                                      | Average (Age)    | 0.055        | 0.075      |                         |               |                  |             |
| <i>Family_XIII</i>                   | Early            | 0.075        | 0.064      | 0.070                   | 0.708         |                  | 0.912       |
|                                      | Late             | 0.076        | 0.030      | 0.053                   |               |                  |             |

|                           |               |       |       |       |       |       |
|---------------------------|---------------|-------|-------|-------|-------|-------|
|                           | Average (Age) | 0.076 | 0.047 |       | 0.832 |       |
| <i>Pseudomonadaceae</i>   | Early         | 0.006 | 0.008 | 0.007 | 0.502 | 0.736 |
|                           | Late          | 0.002 | 0.001 | 0.002 |       |       |
|                           | Average (Age) | 0.004 | 0.005 |       |       | 0.916 |
| <i>Staphylococcaceae</i>  | Early         | 0.003 | 0.000 | 0.002 | 0.990 | 0.818 |
|                           | Late          | 0.004 | 0.000 | 0.002 |       |       |
|                           | Average (Age) | 0.004 | 0.000 |       |       | 1.131 |
| <i>Anaeroplasmataceae</i> | Early         | 3.444 | 1.118 | 2.281 | 0.513 | 0.850 |
|                           | Late          | 1.788 | 0.275 | 1.032 |       |       |
|                           | Average (Age) | 2.616 | 0.697 |       |       | 0.526 |
| <i>Bacillaceae</i>        | Early         | 4.044 | 1.726 | 2.885 | 0.837 | 0.805 |
|                           | Late          | 3.246 | 3.838 | 3.542 |       |       |
|                           | Average (Age) | 3.645 | 2.782 |       |       | 0.664 |
| <i>Clostridiaceae_1</i>   | Early         | 0.257 | 0.222 | 0.239 | 0.888 | 0.411 |
|                           | Late          | 0.659 | 0.022 | 0.340 |       |       |
|                           | Average (Age) | 0.458 | 0.122 |       |       | 0.669 |
| <i>Not_Assigned</i>       | Early         | 1.560 | 0.149 | 0.854 | 0.535 | 0.895 |
|                           | Late          | 0.339 | 0.007 | 0.173 |       |       |
|                           | Average (Age) | 0.950 | 0.078 |       |       | 0.805 |
| <i>Peptococcaceae</i>     | Early         | 0.027 | 0.012 | 0.019 | 0.835 | 0.692 |
|                           | Late          | 0.014 | 0.035 | 0.024 |       |       |
|                           | Average (Age) | 0.020 | 0.023 |       |       | 0.913 |
| <i>Rikenellaceae</i>      | Early         | 0.001 | 0.000 | 0.001 | 0.720 | 0.970 |
|                           | Late          | 0.000 | 0.008 | 0.004 |       |       |
|                           | Average (Age) | 0.001 | 0.004 |       |       | 0.680 |
| <i>Streptococcaceae</i>   | Early         | 0.000 | 0.043 | 0.021 | 0.595 | 1.116 |
|                           | Late          | 0.002 | 0.000 | 0.001 |       |       |
|                           | Average (Age) | 0.001 | 0.021 |       |       | 0.680 |

**Table S2.** The effect of hatching time and parent age on the caecal microbiota composition at the family level at 39 day of age.

| Family (%)                           | Hatching time | Parent flock age |            |                         | FDR p-values  |                  |             |
|--------------------------------------|---------------|------------------|------------|-------------------------|---------------|------------------|-------------|
|                                      |               | Young parent     | Old parent | Average (Hatching time) | Hatching time | Parent flock Age | Interaction |
| <i>Ruminococcaceae</i>               | Early         | 29.016           | 28.005     | 28.510                  | 0.911         | 0.639            | 0.762       |
|                                      | Late          | 30.406           | 27.834     | 29.120                  |               |                  |             |
|                                      | Average (Age) | 29.711           | 27.919     |                         |               |                  |             |
| <i>Lachnospiraceae</i>               | Early         | 25.967           | 20.575     | 23.271                  | 0.892         | 0.863            | 0.680       |
|                                      | Late          | 23.783           | 26.714     | 25.249                  |               |                  |             |
|                                      | Average (Age) | 24.875           | 23.645     |                         |               |                  |             |
| <i>Lactobacillaceae</i>              | Early         | 25.336           | 32.926     | 29.131                  | 0.735         | 0.861            | 0.657       |
|                                      | Late          | 24.549           | 20.733     | 22.641                  |               |                  |             |
|                                      | Average (Age) | 24.943           | 26.830     |                         |               |                  |             |
| <i>Bacteroidaceae</i>                | Early         | 2.984            | 1.325      | 2.155                   | 1.012         | 1.016            | 0.896       |
|                                      | Late          | 2.628            | 1.709      | 2.169                   |               |                  |             |
|                                      | Average (Age) | 2.806            | 1.517      |                         |               |                  |             |
| <i>Erysipelotrichaceae</i>           | Early         | 2.016            | 1.862      | 1.939                   | 0.613         | 0.979            | 0.785       |
|                                      | Late          | 1.822            | 3.414      | 2.618                   |               |                  |             |
|                                      | Average (Age) | 1.919            | 2.638      |                         |               |                  |             |
| <i>Peptostreptococcaceae</i>         | Early         | 0.822            | 0.857      | 0.839                   | 1.015         | 0.604            | 0.810       |
|                                      | Late          | 1.401            | 2.214      | 1.807                   |               |                  |             |
|                                      | Average (Age) | 1.112            | 1.535      |                         |               |                  |             |
| <i>Clostridiales_vadinBB60_group</i> | Early         | 3.259            | 2.806      | 3.032                   | 0.963         | 0.720            | 0.853       |
|                                      | Late          | 3.651            | 2.622      | 3.136                   |               |                  |             |
|                                      | Average (Age) | 3.455            | 2.714      |                         |               |                  |             |
| <i>Enterococcaceae</i>               | Early         | 0.081            | 0.482      | 0.282                   | 0.862         | 0.647            | 0.789       |
|                                      | Late          | 0.078            | 0.257      | 0.167                   |               |                  |             |
|                                      | Average (Age) | 0.080            | 0.370      |                         |               |                  |             |
| <i>Enterobacteriaceae</i>            | Early         | 0.142            | 0.113      | 0.128                   | 0.689         | 0.844            | 0.824       |
|                                      | Late          | 0.449            | 0.335      | 0.392                   |               |                  |             |
|                                      | Average (Age) | 0.296            | 0.224      |                         |               |                  |             |
| <i>Christensenellaceae</i>           | Early         | 1.529            | 0.976      | 1.252                   | 0.847         | 0.951            | 0.739       |
|                                      | Late          | 1.256            | 1.703      | 1.479                   |               |                  |             |
|                                      | Average (Age) | 1.392            | 1.340      |                         |               |                  |             |
| <i>Defluviitaleaceae</i>             | Early         | 0.185            | 0.100      | 0.142                   | 0.938         | 0.628            | 0.488       |
|                                      | Late          | 0.117            | 0.152      | 0.135                   |               |                  |             |
|                                      | Average (Age) | 0.151            | 0.126      |                         |               |                  |             |
| <i>Eggerthellaceae</i>               | Early         | 0.021            | 0.029      | 0.025                   | 0.858         | 1.921            | 0.814       |
|                                      | Late          | 0.017            | 0.042      | 0.030                   |               |                  |             |
|                                      | Average (Age) | 0.019            | 0.035      |                         |               |                  |             |
| <i>Family_XIII</i>                   | Early         | 0.220            | 0.234      | 0.227                   | 0.575         |                  | 0.675       |
|                                      | Late          | 0.131            | 0.218      | 0.174                   |               |                  |             |

|                           |               |       |       |       |       |       |
|---------------------------|---------------|-------|-------|-------|-------|-------|
|                           | Average (Age) | 0.175 | 0.226 |       | 0.639 |       |
| <i>Pseudomonadaceae</i>   | Early         | 0.000 | 0.005 | 0.002 | 0.957 | 0.803 |
|                           | Late          | 0.002 | 0.003 | 0.003 |       |       |
|                           | Average (Age) | 0.001 | 0.004 |       |       | 0.588 |
| <i>Staphylococcaceae</i>  | Early         | 0.004 | 0.000 | 0.002 | 0.860 | 0.925 |
|                           | Late          | 0.012 | 0.003 | 0.007 |       |       |
|                           | Average (Age) | 0.008 | 0.001 |       |       | 0.755 |
| <i>Anaeroplasmataceae</i> | Early         | 0.008 | 0.063 | 0.036 | 0.812 | 0.828 |
|                           | Late          | 0.002 | 0.034 | 0.018 |       |       |
|                           | Average (Age) | 0.005 | 0.049 |       |       | 0.844 |
| <i>Bacillaceae</i>        | Early         | 1.465 | 2.362 | 1.914 | 0.884 | 0.647 |
|                           | Late          | 1.671 | 0.717 | 1.194 |       |       |
|                           | Average (Age) | 1.568 | 1.540 |       |       | 0.966 |
| <i>Clostridiaceae_1</i>   | Early         | 0.000 | 0.007 | 0.003 | 0.953 | 0.842 |
|                           | Late          | 0.033 | 0.216 | 0.124 |       |       |
|                           | Average (Age) | 0.016 | 0.112 |       |       | 0.605 |
| <i>Not_Assigned</i>       | Early         | 0.849 | 0.962 | 0.906 | 0.878 | 0.762 |
|                           | Late          | 1.136 | 0.949 | 1.042 |       |       |
|                           | Average (Age) | 0.992 | 0.955 |       |       | 0.965 |
| <i>Peptococcaceae</i>     | Early         | 0.514 | 0.423 | 0.469 | 0.880 | 0.767 |
|                           | Late          | 0.594 | 0.425 | 0.510 |       |       |
|                           | Average (Age) | 0.554 | 0.424 |       |       | 0.742 |
| <i>Rikenellaceae</i>      | Early         | 0.018 | 0.003 | 0.010 | 0.814 | 0.650 |
|                           | Late          | 0.003 | 0.007 | 0.005 |       |       |
|                           | Average (Age) | 0.011 | 0.005 |       |       | 0.576 |
| <i>Streptococcaceae</i>   | Early         | 0.426 | 0.044 | 0.235 | 0.747 | 0.695 |
|                           | Late          | 0.589 | 1.844 | 1.217 |       |       |
|                           | Average (Age) | 0.508 | 0.944 |       |       | 0.622 |
